# Supplementary material for: Synthesis, characterization and application of starburst 9-alkyl-1,3,6,8-tetraaryl-carbazole derivatives for blue-violet to UV OLEDs
Source: Royal Society of Chemistry journal article supplement (doi:10.1039/c1ra00014d), 2011-01-01
Supplement: c1ra00014d.pdf [file c1ra00014d.pdf]

## Supplementary data

### Synthesis, Characterization and Application of Starburst

#### 9-Alkyl-1,3,6,8-tetraaryl-carbazole derivatives for Blue-violet to UV

#### OLEDs

Fangfang Niu, Hanben Niu,\* Yawei Liu, Jiarong Lian and Pengju Zeng\*

*Key Laboratory of Optoelectronics Devices and Systems of Ministry of Education,  
College of Optoelectronics Engineering, Shenzhen University,  
Shenzhen, 518060, P. R. China. E-mail: zengpj@szu.edu.cn; HBNiu@szu.edu.cn*

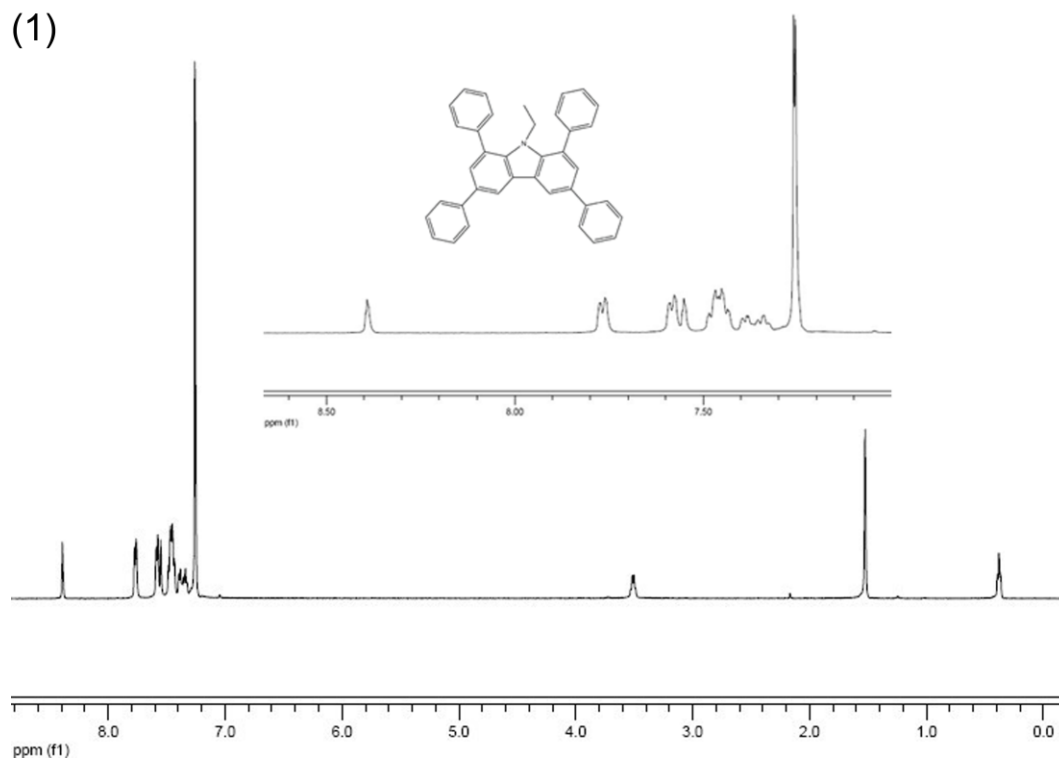

(2)

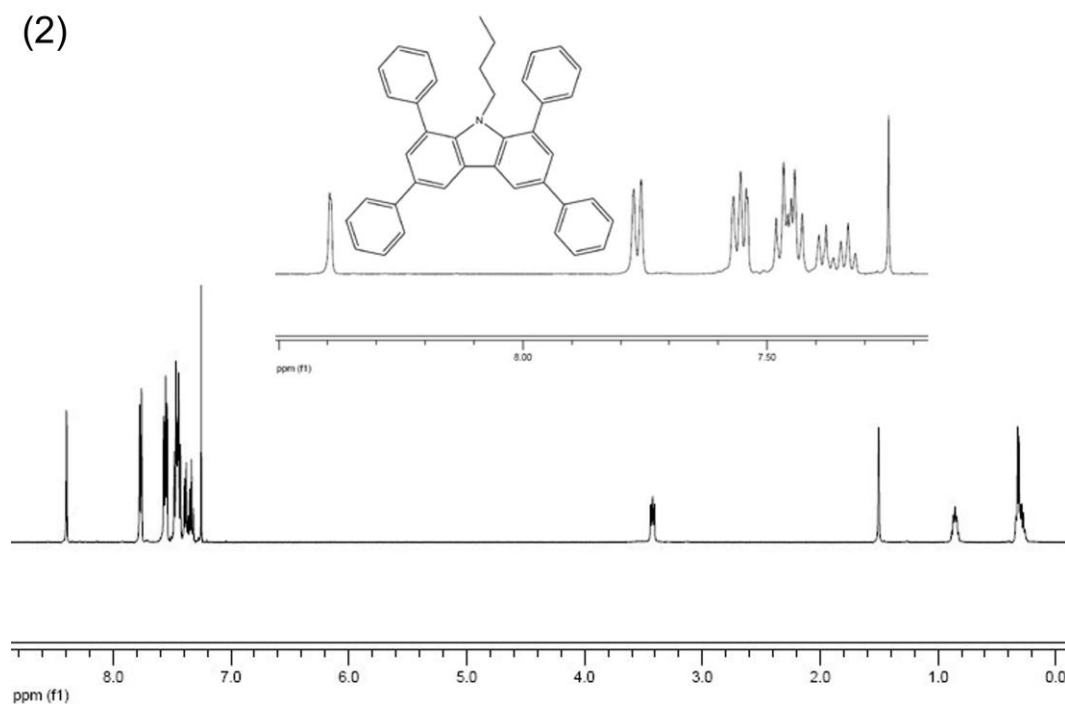

(3)

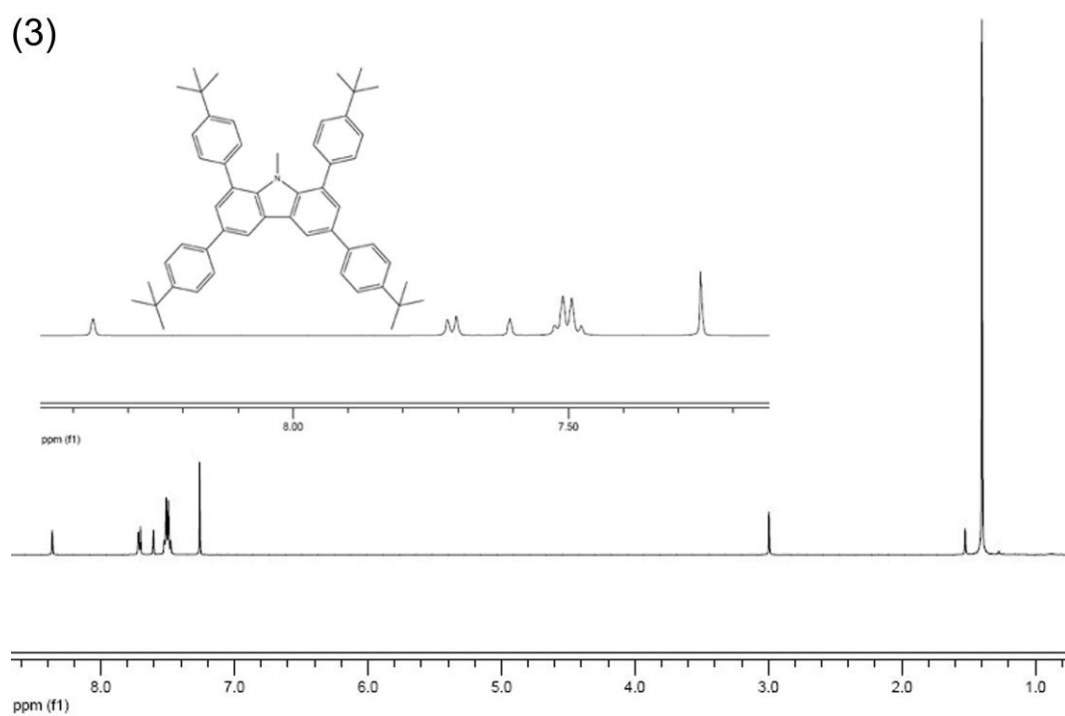

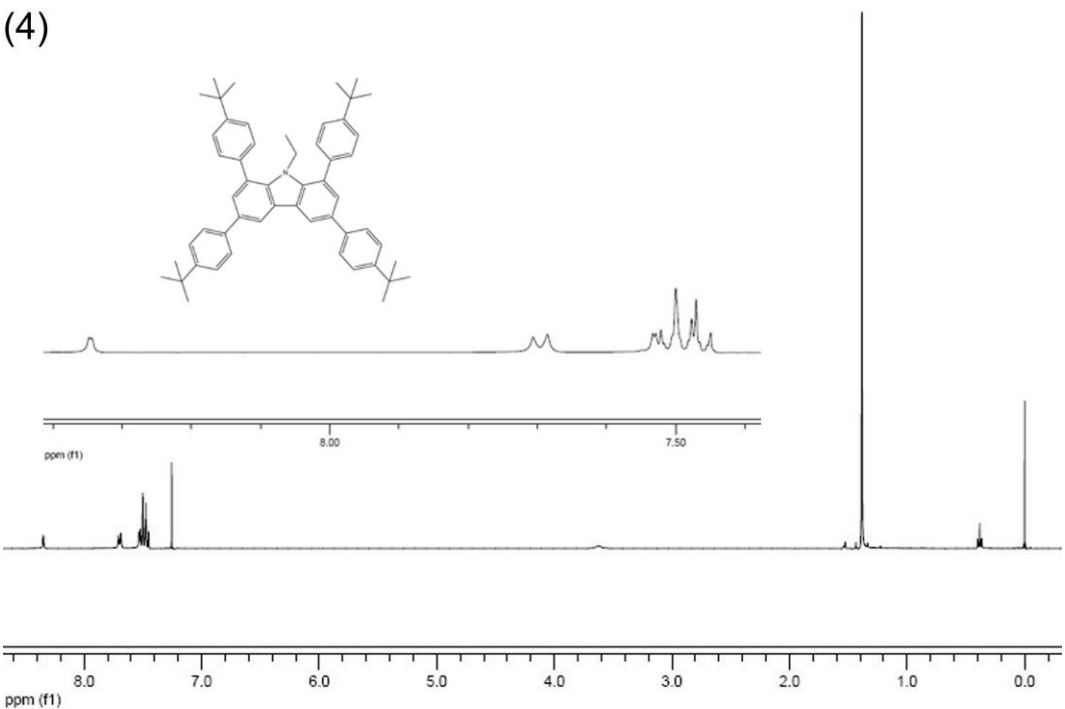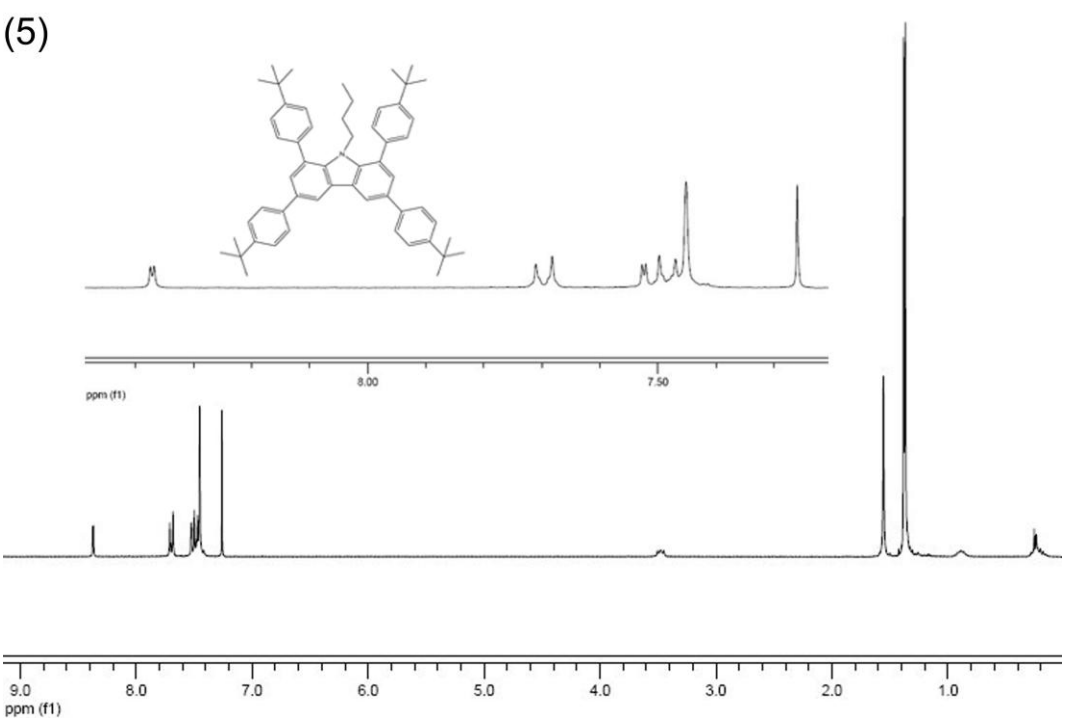

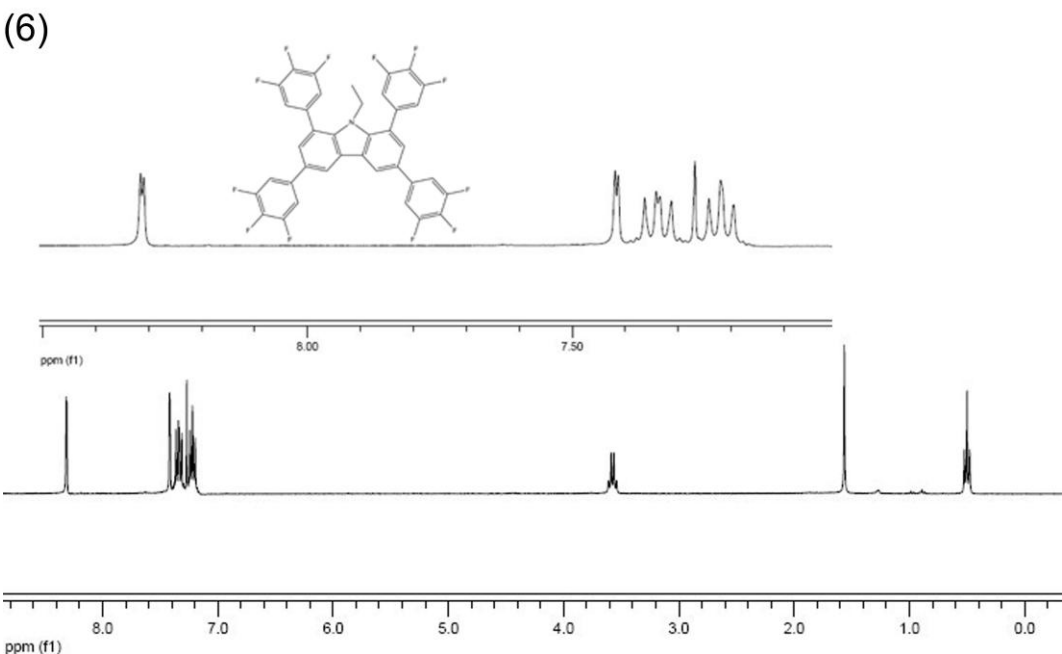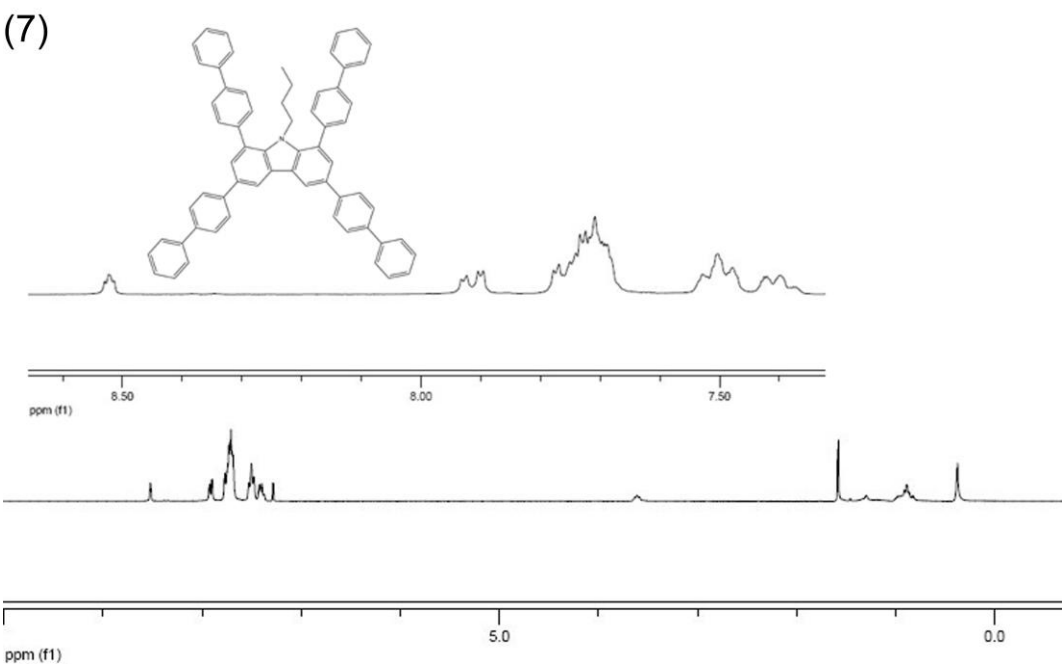

(8)

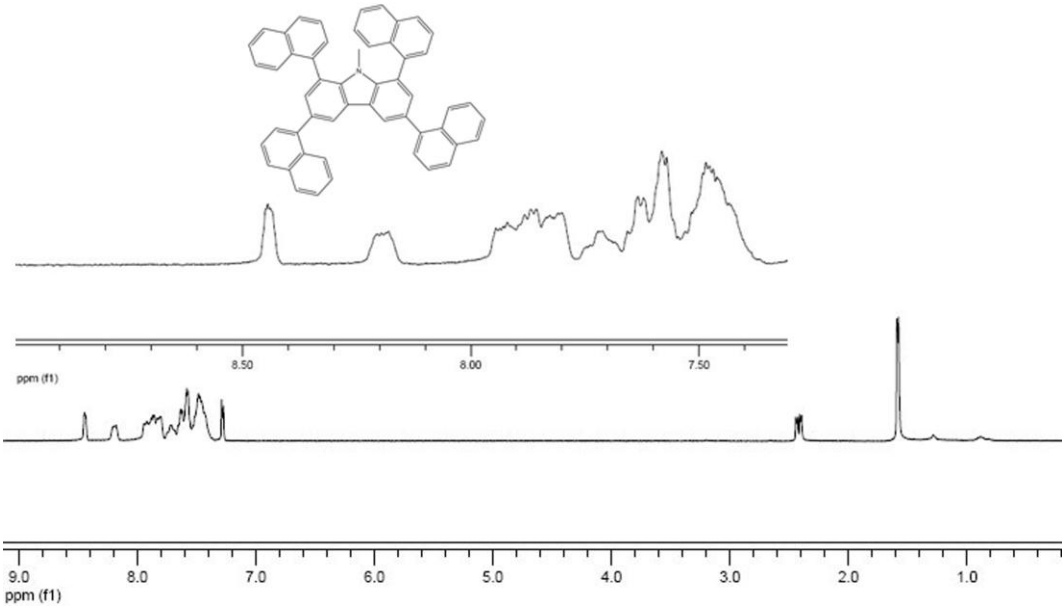

(9)

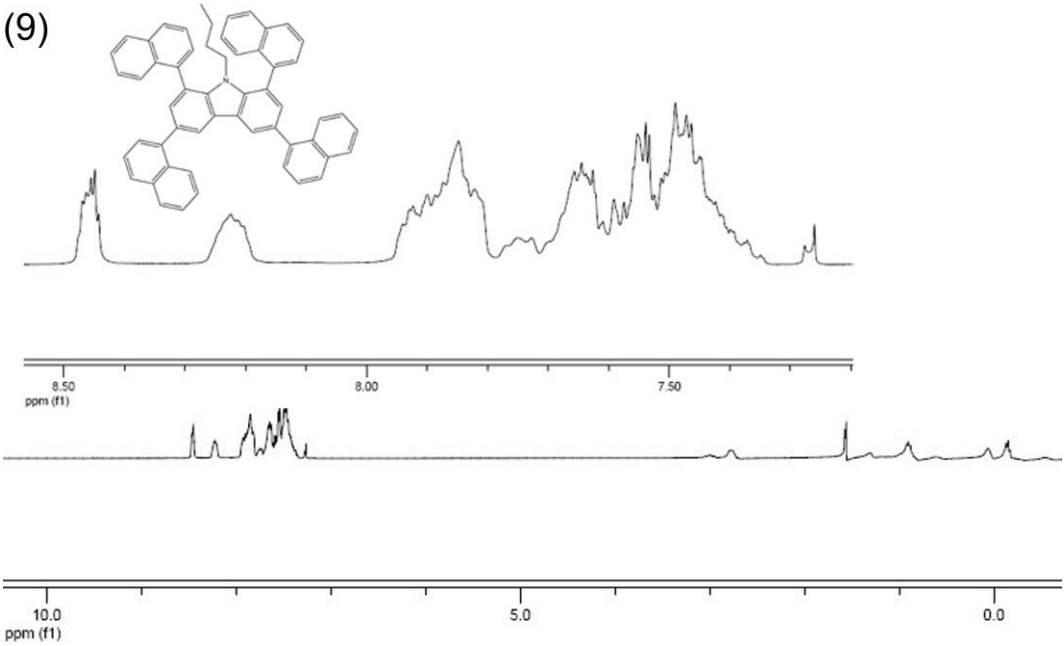

(10)

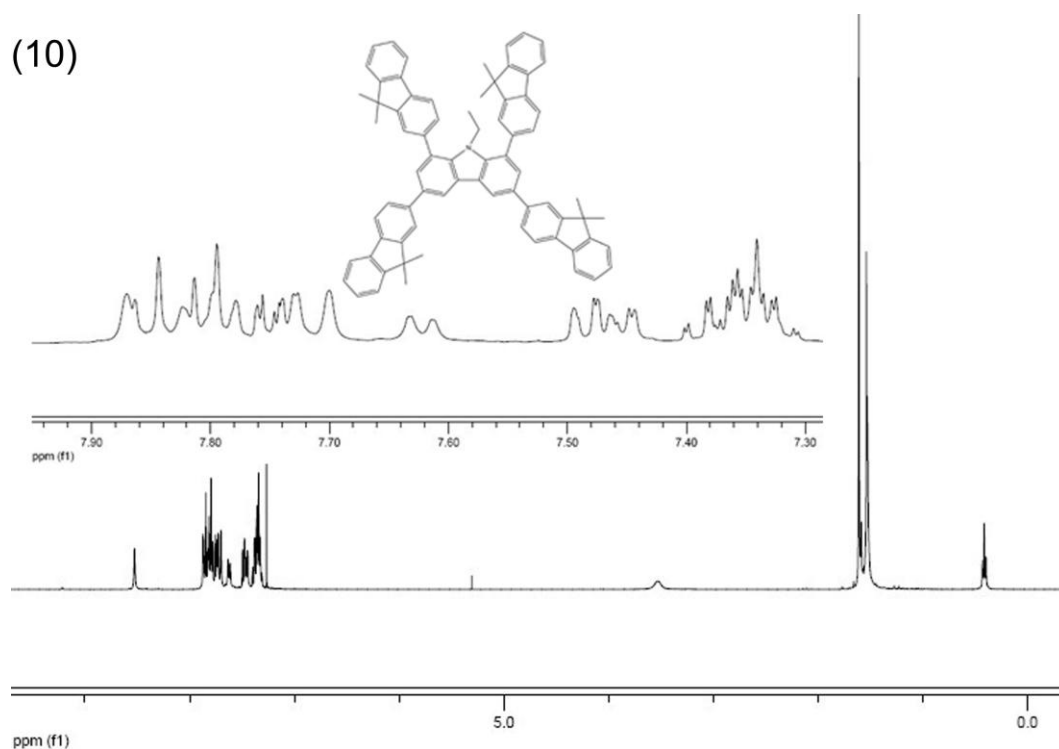

(11)

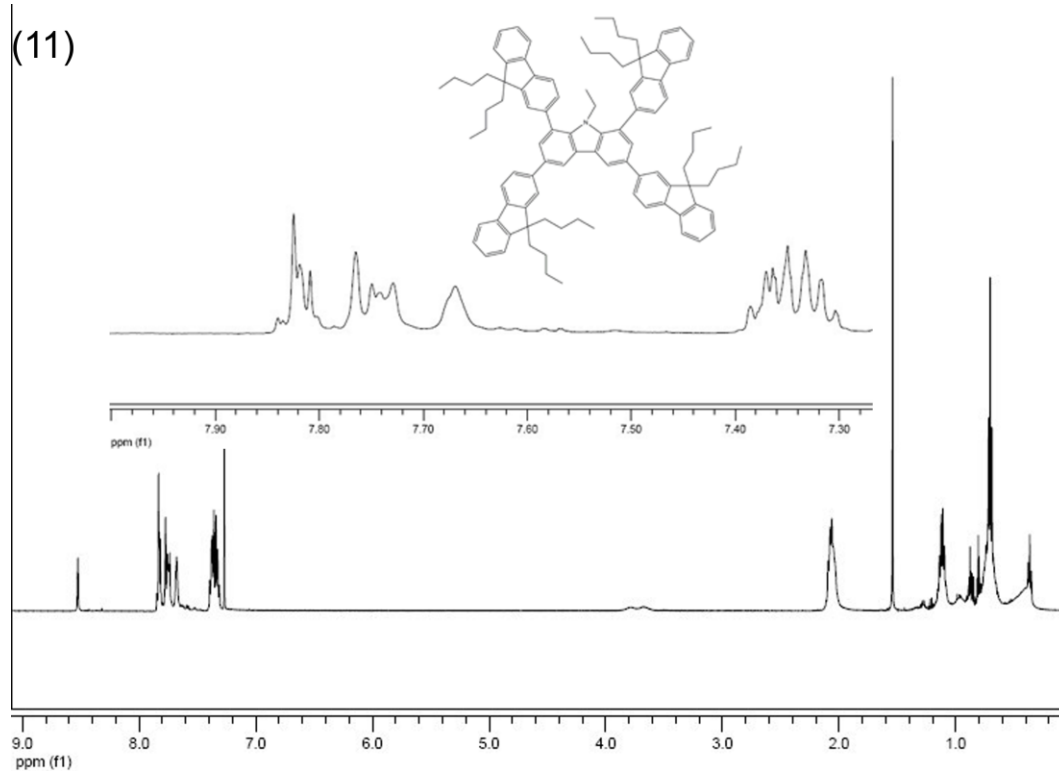

(12)

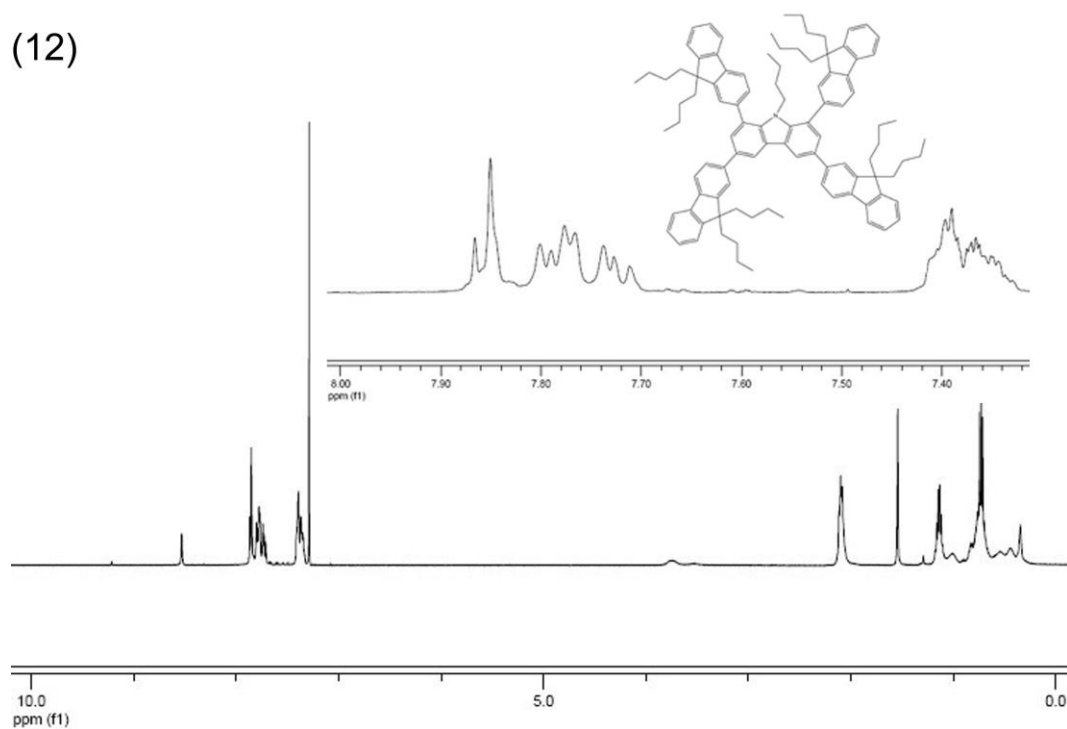

Fig. S1  $^1\text{H}$ -NMR of compounds 1-12 in  $\text{CDCl}_3$ .

(1)

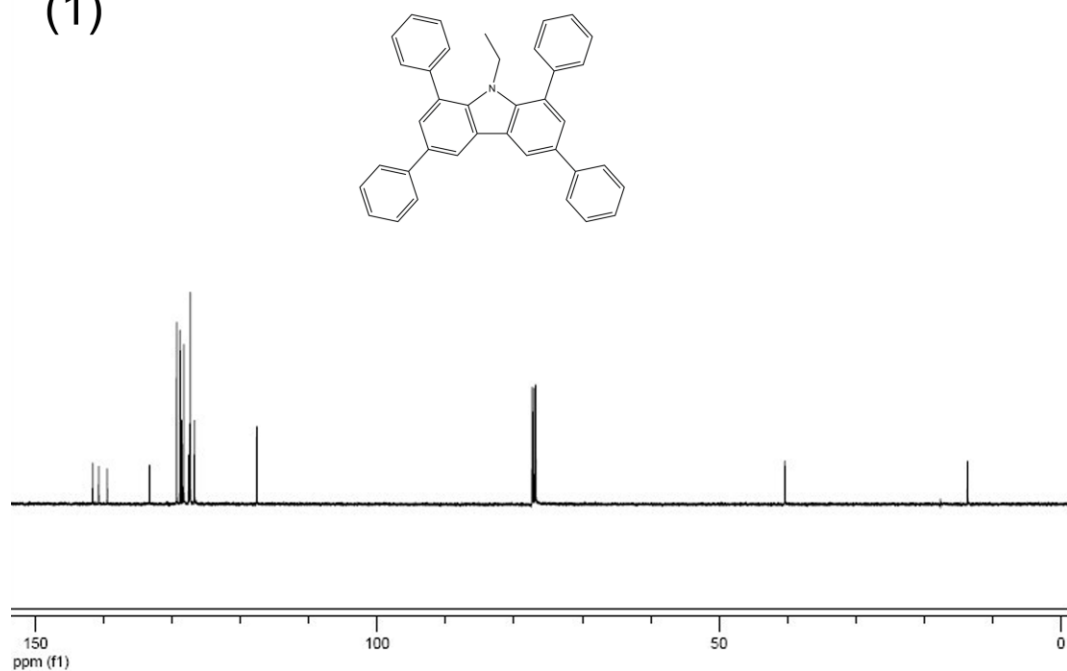

(2)

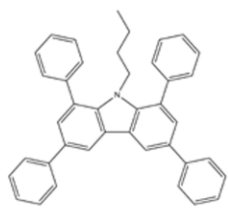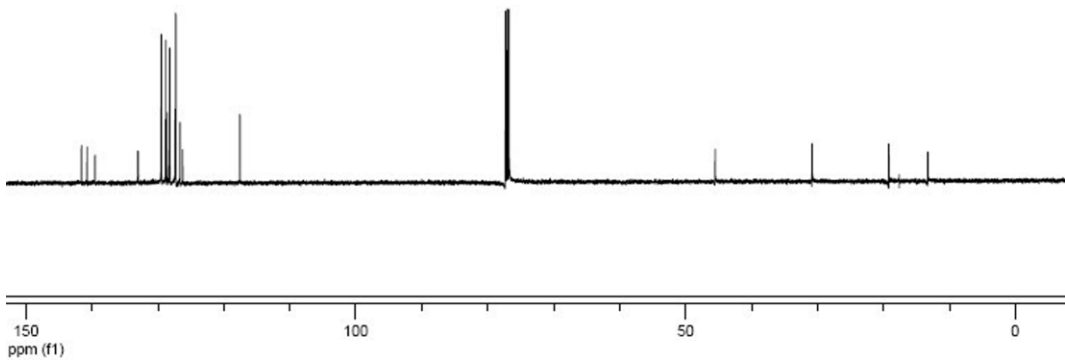

(3)

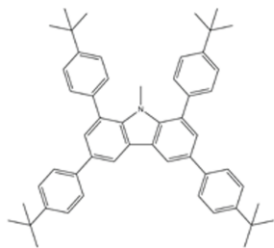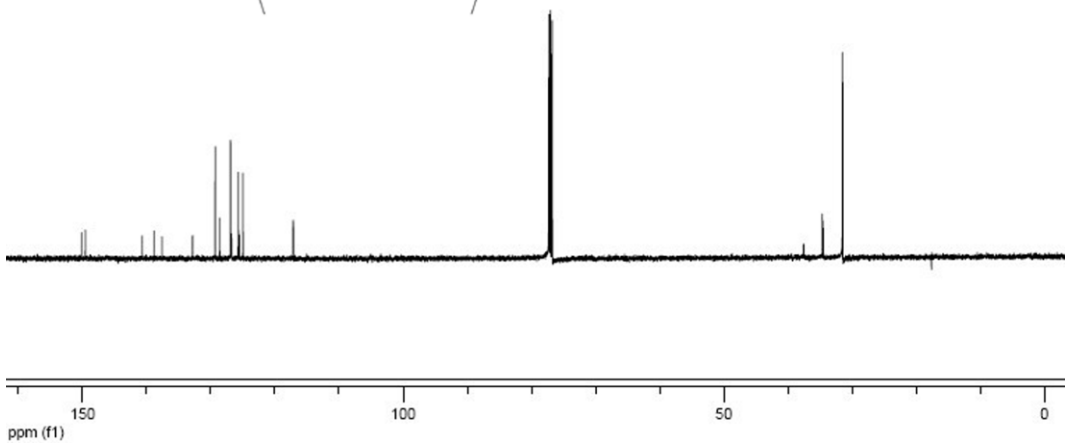



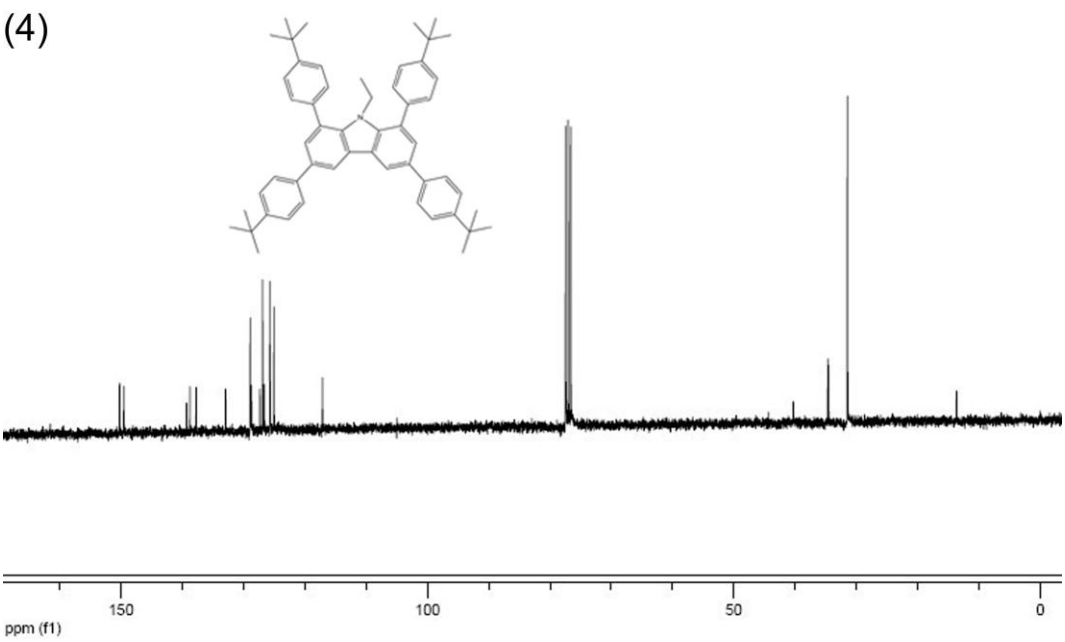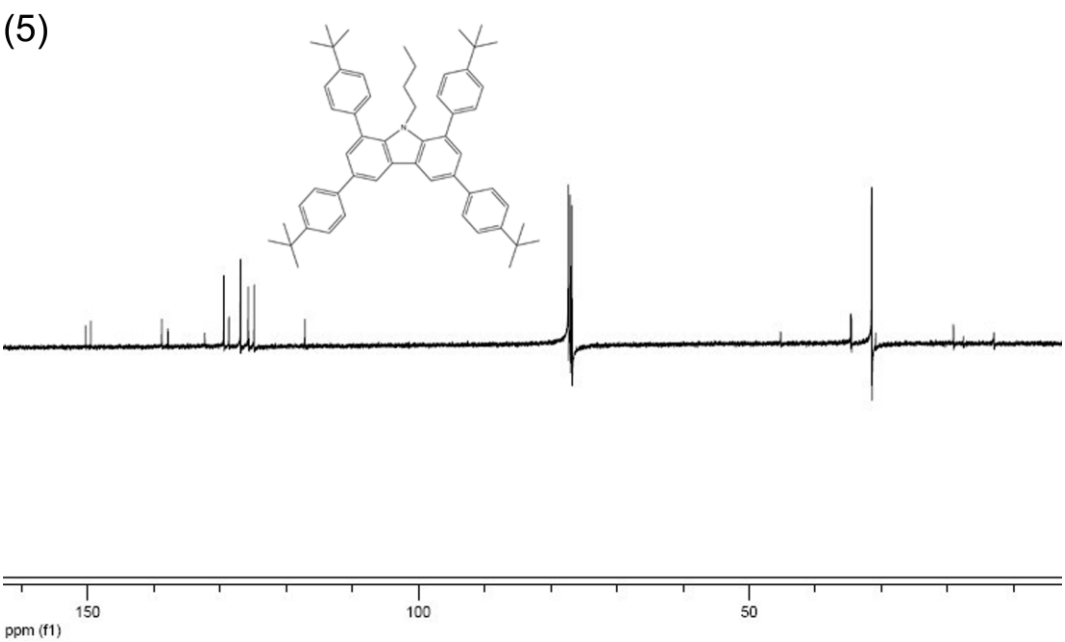

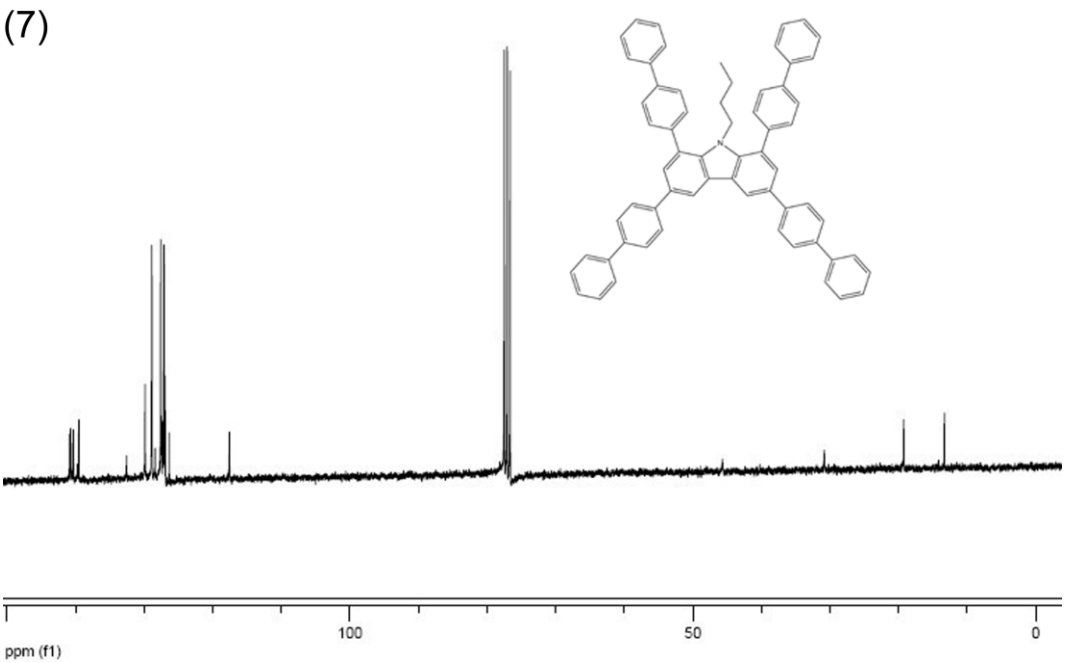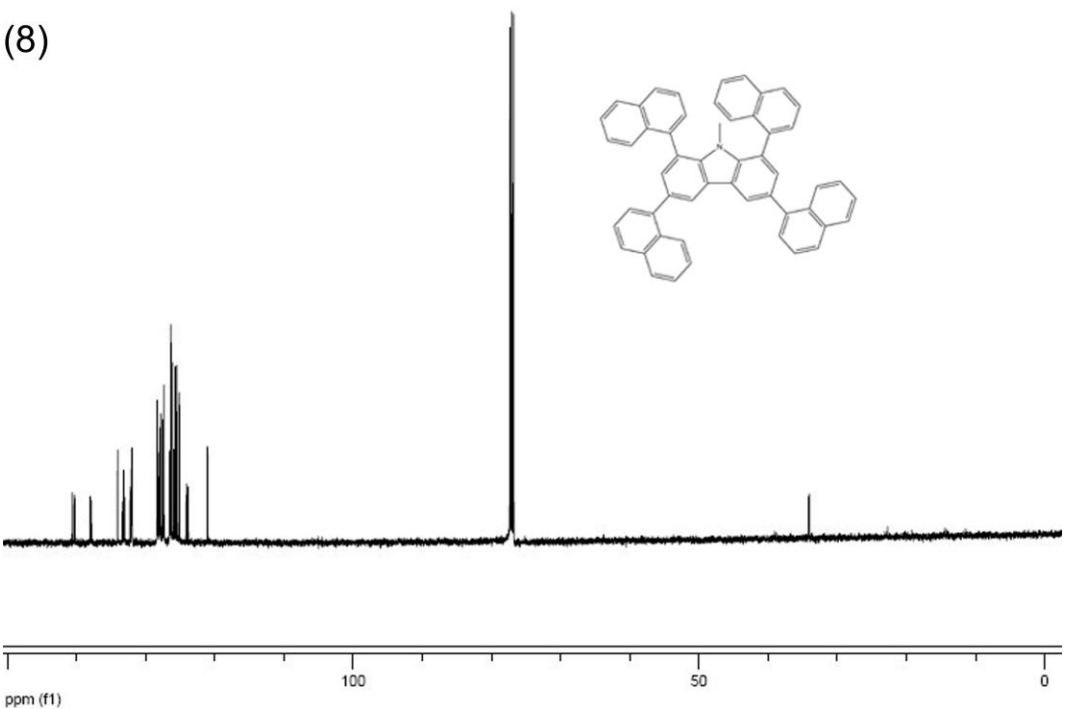

(9)

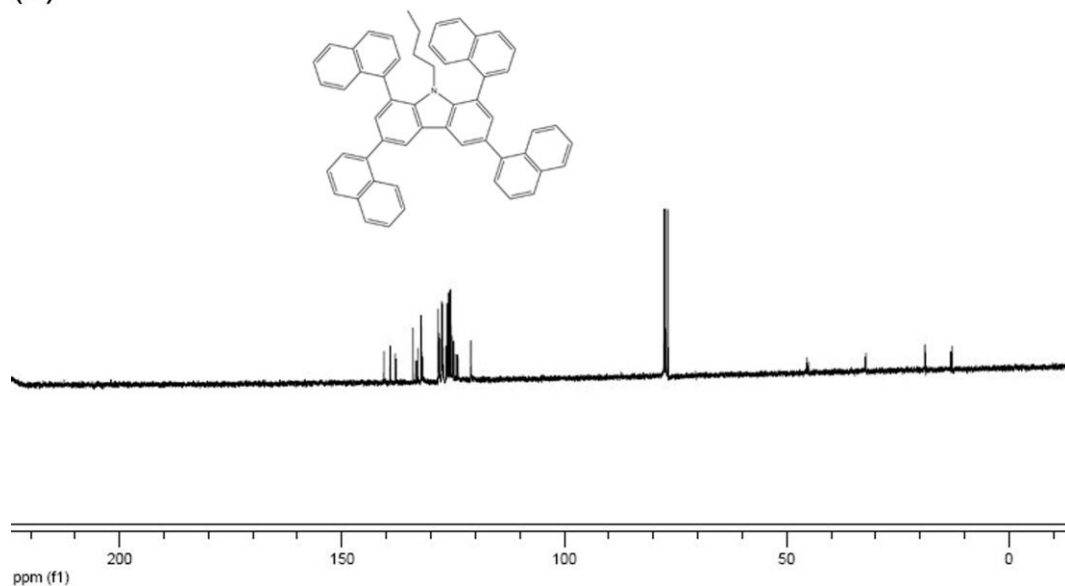

(10)

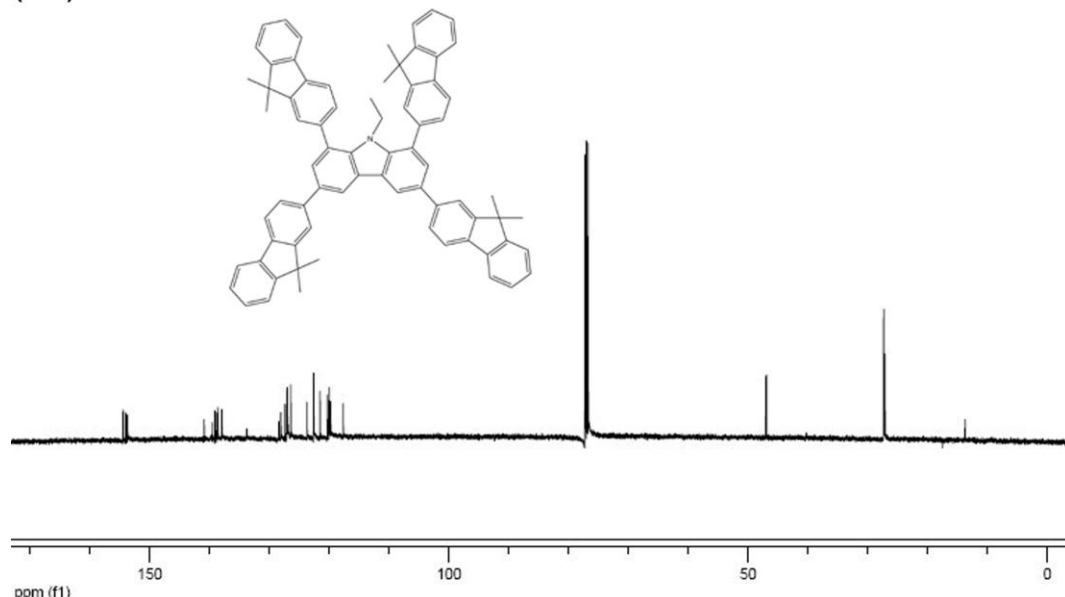

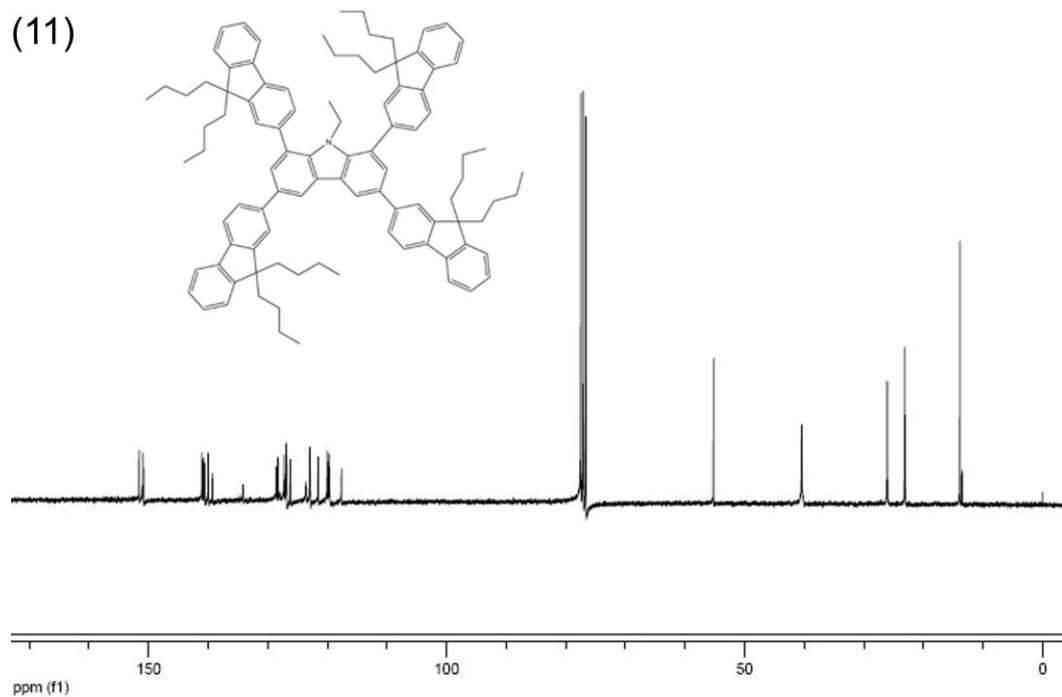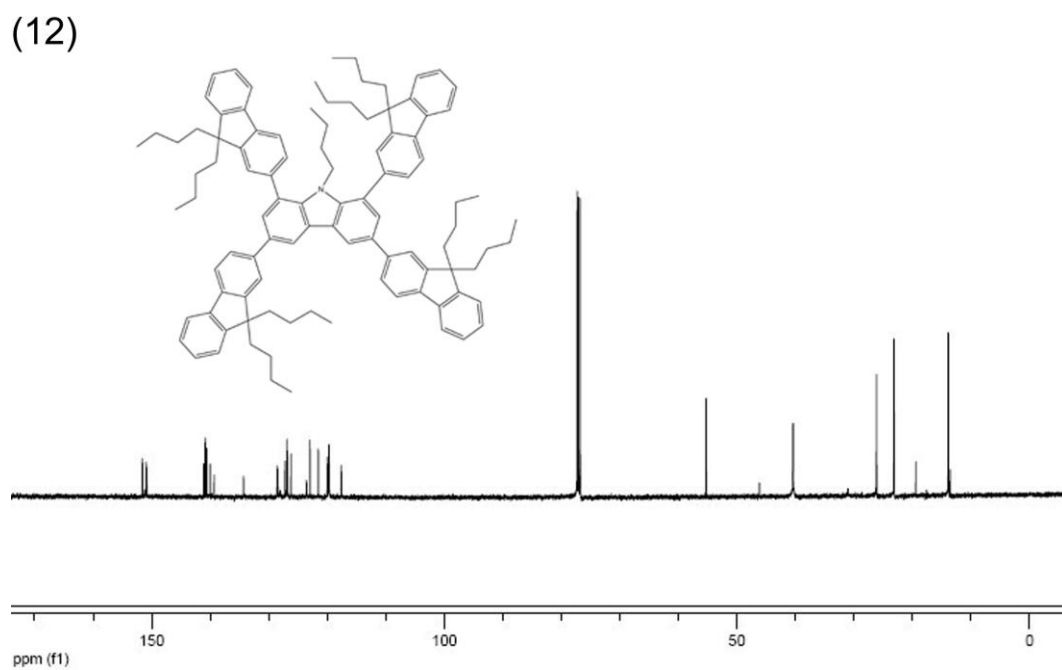

Fig. S2  $^{13}\text{C}$ -NMR of compounds 1-12 in  $\text{CDCl}_3$ .

(1)

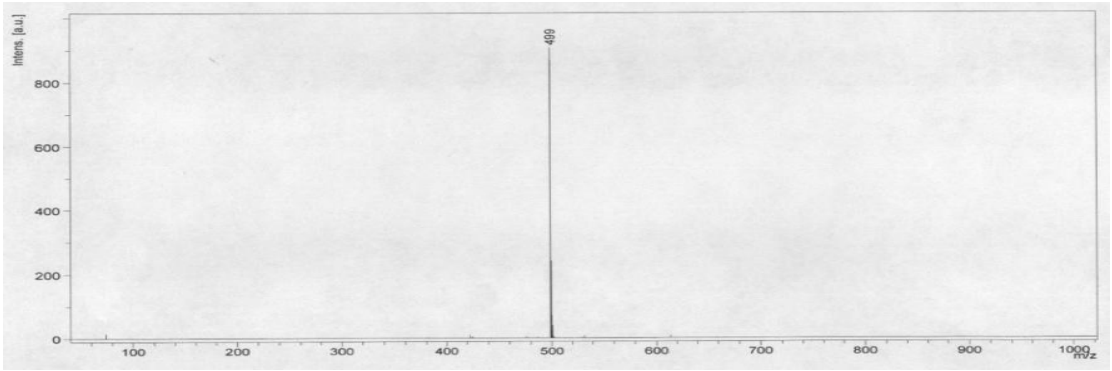

(4)

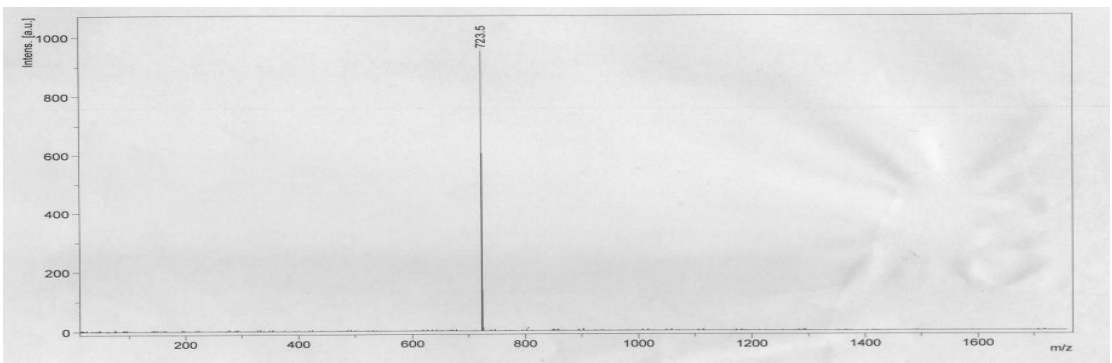

(6)

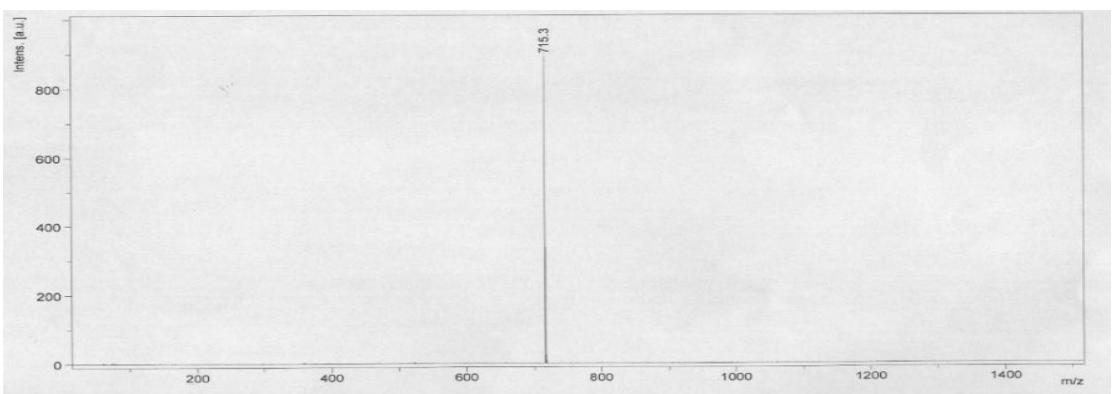

(10)

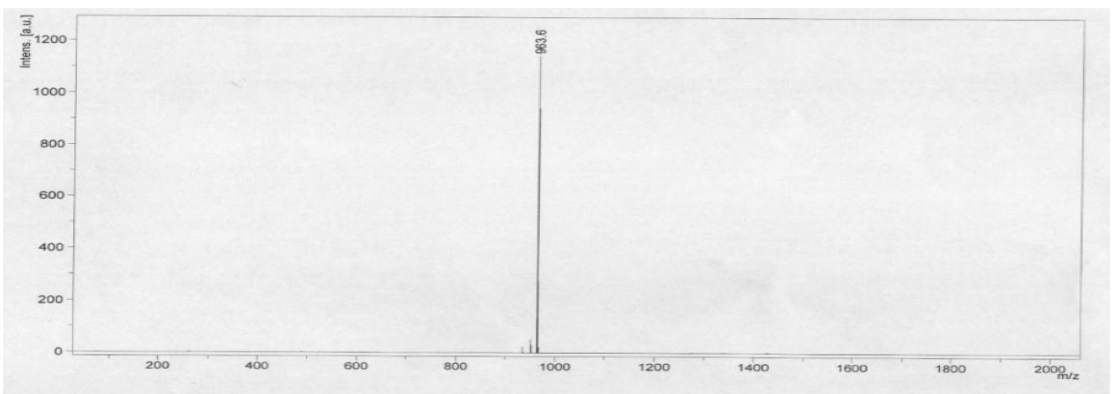

(11)

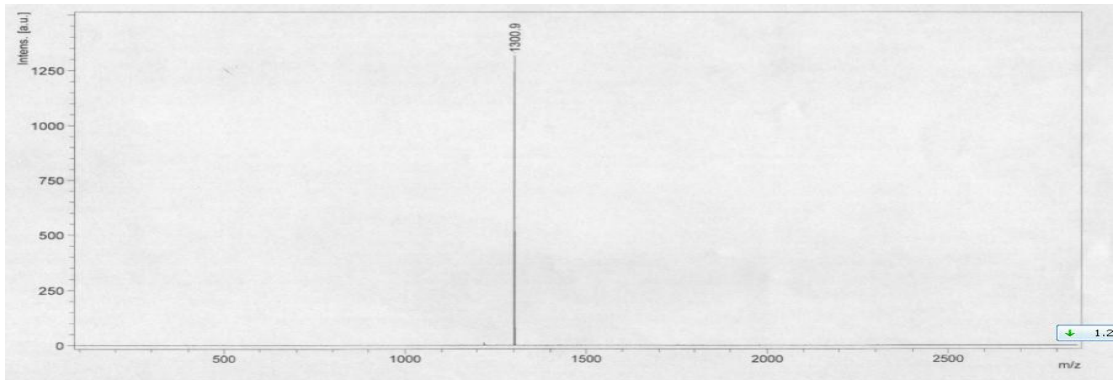

Fig. S3 MALDI-TOF-MS spectra of 1, 4, 6, 10 and 11.  
(2)

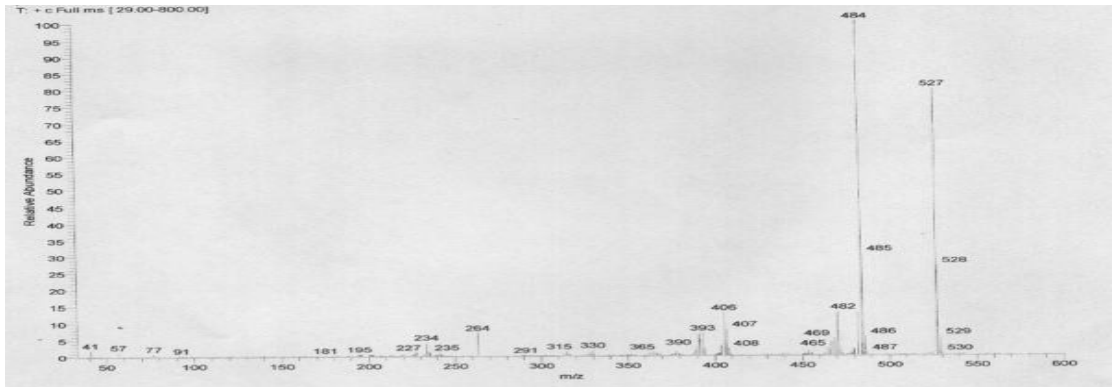

(3)

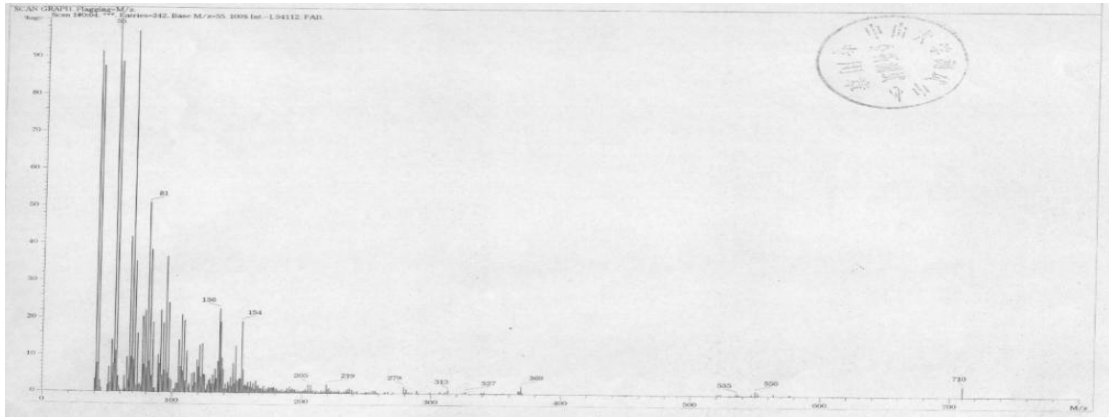

(5)

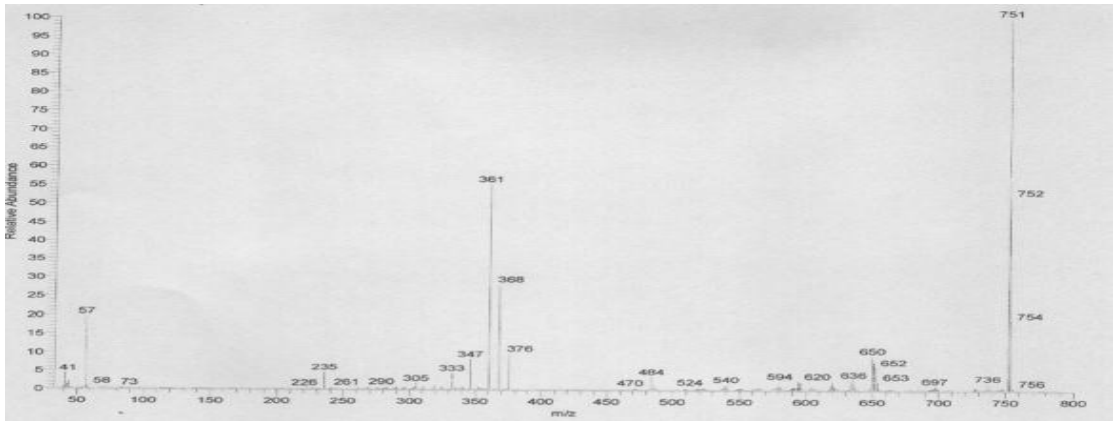

(7)

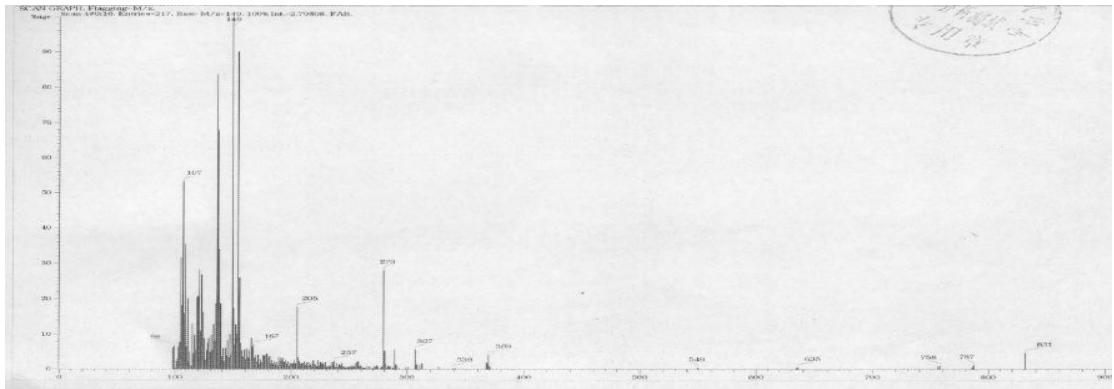

(8)

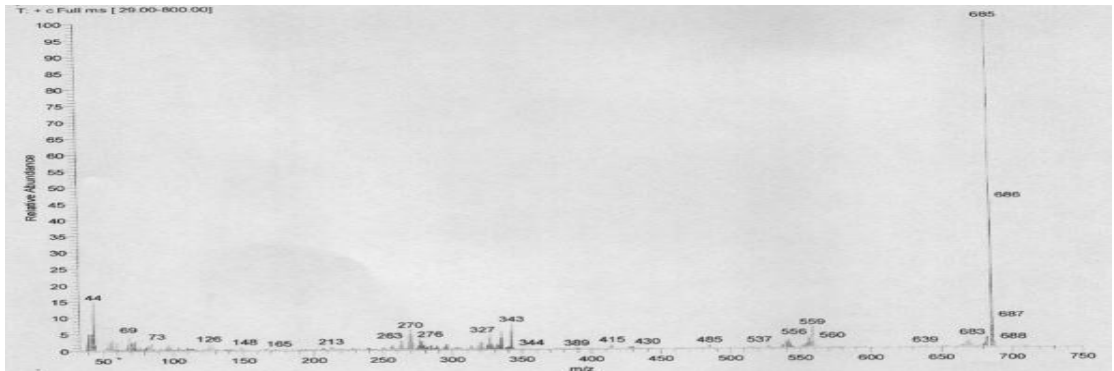

(9)

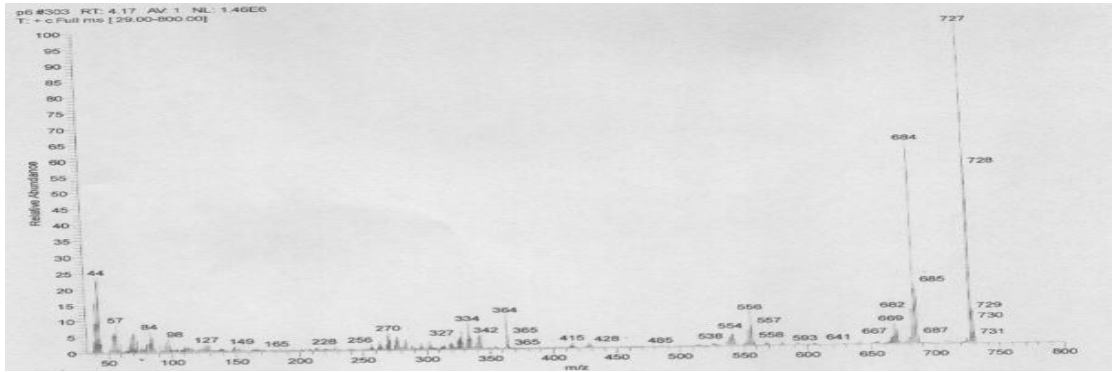

(12)

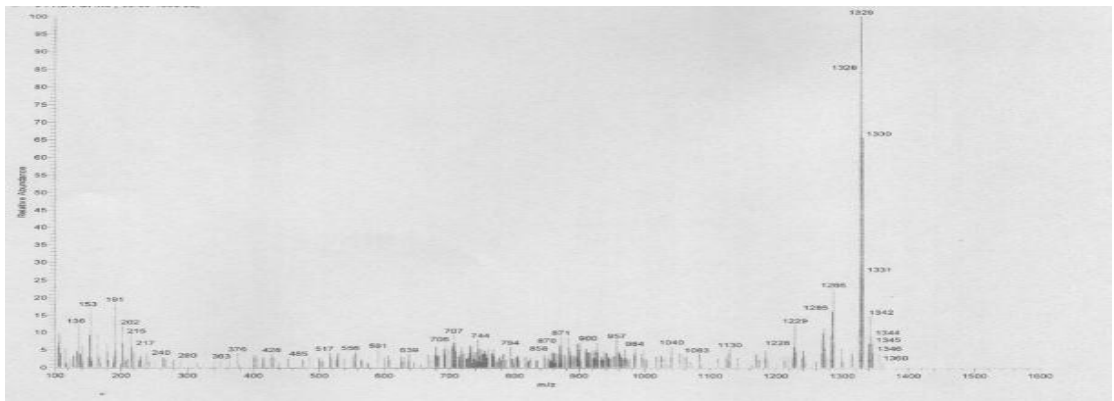

Fig. S4 FAB MS spectra of 2, 3, 5, 7, 8, 9 and 12.
